# Supplementary material
Source: publisher figshare collection journal article supplement (https://tandf.figshare.com/articles/dataset/_/1623067)
Supplement: Supplementary file 1 [file 1]

Archive with 2 entries (2 files):
- Suppl_TabII.xlsx
- 928418_suppl.pdf
