# Supplementary material
Source: publisher figshare collection journal article supplement (https://tandf.figshare.com/articles/dataset/_/1623067)
Supplement: Supplementary file 1 [file 1 › 928418_suppl.pdf]

*Supplementary material for Søndergaard J, et al. A comparison of morbidity following conformal versus intensity-modulated radiotherapy for urinary bladder cancer. Acta Oncol 2014;53:1321–8.*

Supplementary Table I. Peak acute toxicity incidence of CRT versus IMRT.

|                           | Total    |        | CRT      |        | IMRT     |        | p-value |
|---------------------------|----------|--------|----------|--------|----------|--------|---------|
|                           | n (%)    | CI 95% | n (%)    | CI 95% | n (%)    | CI 95% |         |
| All patients (n)          | 116      |        | 66       |        | 50       |        |         |
| Diarrhoea $\geq 2$        | 45%      | 36–54% | 56%      | 42–68% | 30%      | 18–45% | 0.008   |
| Frequency $\geq 2$        | 66%      | 57–75% | 67%      | 54–78% | 66%      | 51–79% | 1       |
| Anti-diarrhoea medication | 48%      | 39–58% | 53%      | 40–65% | 42%      | 28–57% | 0.3     |
| Lymph nodes included (%)  | 81 (70%) |        | 39 (59%) |        | 42 (84%) |        |         |
| Diarrhoea $\geq 2$        | 49%      | 38–61% | 69%      | 52–83% | 31%      | 18–47% | 0.0008  |
| Frequency $\geq 2$        | 69%      | 58–79% | 74%      | 58–87% | 64%      | 48–78% | 0.3     |
| Anti-diarrhoea medication | 54%      | 43–65% | 64%      | 47–79% | 45%      | 30–61% | 0.1     |
| Bladder only (%)          | 35 (30%) |        | 27 (41%) |        | 8 (16%)  |        |         |
| Diarrhoea $\geq 2$        | 34%      | 19–52% | 37%      | 19–58% | 25%      | 3–65%  | 0.7     |
| Frequency $\geq 2$        | 60%      | 42–76% | 56%      | 35–75% | 75%      | 35–97% | 0.4     |
| Anti-diarrhoea medication | 34%      | 19–52% | 37%      | 19–58% | 25%      | 3–65%  | 0.7     |

CRT, 3D conformal radiotherapy; IMRT, intensity-modulated radiotherapy; Data are presented in % with 95% confidence interval from a binominal distribution. Differences between groups are tested with Fishers exact test.

Supplementary Table II. The spreadsheet presents patient individual data on peak acute diarrhoea in relation to the volume (cm<sup>3</sup>) of bowel cavity (V<sub>bowel</sub> cavity, x) irradiated to doses of x Gy.

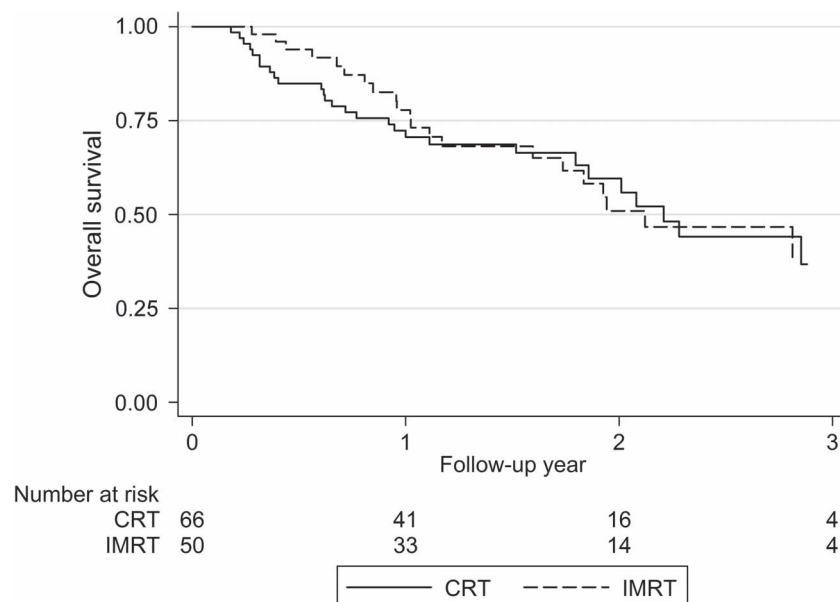

Supplementary Figure 1. Kaplan-Meier overall survival curve according to treatment technique.
