# Supplementary material
Source: publisher figshare collection journal article supplement (https://tandf.figshare.com/articles/dataset/_/1623067)
Supplement: Supplementary file 1 [file 1 › Suppl_TabII.xlsx]

## Sheet: Ark1
id	age	V0	V1	V2	V3	V4	V5	V6	V7	V8	V9	V10	V11	V12	V13	V14	V15	V16	V17	V18	V19	V20	V21	V22	V23	V24	V25	V26	V27	V28	V29	V30	V31	V32	V33	V34	V35	V36	V37	V38	V39	V40	V41	V42	V43	V44	V45	V46	V47
1	1974-10-21	2214.79	2202.83	2038.03	1892.47	1812.33	1754.29	1705.55	1658.81	1600.17	1531.25	1457.07	1385.27	1326.76	1277.32	1233.26	1196.88	1168.02	1142.77	1118.21	1094.21	1071.76	1051.37	1032.81	1014.72	996.816	979.95	963.236	946.347	929.142	911.526	893.47	875.529	857.804	839.868	821.925	804.011	786.072	767.961	749.811	731.573	713.077	694.232	674.322	653.723	631.72	608.105	580.848	543.176
2	1963-05-22	2118.96	1934.51	1419.46	1254.01	1176.96	1125.15	1084.37	1050.83	1020.68	985.354	946.036	909.371	877.35	849.532	823.442	796.889	769.285	741.154	711.605	685.126	659.871	637.296	616.894	596.493	576.7	557.621	540.733	525.639	511.683	498.328	485.071	471.724	458.143	445.878	434.322	423.579	413.606	404.112	394.843	385.292	375.045	365.174	355.71	346.317	336.777	326.765	315.617	302.061
3	1978-06-01	826.872	821.167	736.57	706.085	690.531	679.839	670.507	661.796	653.551	646.032	639.319	633.444	627.994	622.58	616.514	609.418	599.958	588.171	576.192	563.47	548.861	533.664	519.455	507.173	496.092	487.445	480.046	473.231	466.687	460.252	453.889	447.523	441.134	434.687	428.128	421.25	414.048	406.562	398.79	390.621	381.922	372.59	362.546	351.484	338.596	323.074	302.19	276.12
4	1978-01-21	1192.65	1192.65	1192.65	1192.65	1192.65	1192.65	1192.65	1192.65	1192.65	1192.54	1188.18	1181.71	1174.04	1165.31	1154.93	1143.61	1131.41	1118.6	1104.04	1089.42	1074.29	1059.87	1046.97	1034.76	1023.52	1012.81	1002.58	992.63	982.699	972.736	962.084	949.755	936.659	923.572	910.56	897.33	883.788	869.16	852.975	835.54	818.199	800.235	780.878	760.083	737.934	713.348	685.027	639.542
5	1969-11-04	1963.8	1673.29	1382.69	1297.71	1249.27	1212.96	1184.47	1160.35	1134.5	1096.2	1056.83	1016.55	975.885	939.907	908.194	878.482	851.589	826.042	801.075	776.202	750.366	724.094	698.064	672.143	644.549	618.653	596.538	577.2	559.72	543.212	527.645	512.523	496.63	479.439	462.2	445.905	431.129	417.248	403.274	389.468	376.08	363.018	349.578	335.69	320.965	305.306	288.221	269.766
6	1976-07-05	1413.2	1234.09	1007.24	948.456	919.055	900.092	884.097	869.171	855.606	842.61	830.681	819.87	809.993	800.535	791.075	781.545	771.705	761.391	750.113	736.853	721.102	704.005	686.305	668.469	650.152	631.727	615.148	598.357	582.394	567.7	554.818	542.91	531.683	520.281	509.029	497.991	486.859	475.744	464.768	454.097	443.512	432.82	421.873	410.478	398.297	384.964	369.729	349.43
7	1976-09-07	2023.53	2019.36	1918.68	1827.22	1764.48	1723.8	1689.59	1656.37	1623.09	1592.12	1563.58	1530.05	1479.93	1421.09	1368.14	1320.2	1272.28	1219.35	1156.78	1096.3	1054.41	1017.21	982.576	950.258	920.667	893.002	867.959	844.352	821.892	803.29	788.074	775.206	763.181	751.464	739.686	727.891	716.501	705.298	693.986	682.598	671.517	660.508	649.236	637.447	624.779	610.842	594.486	568.327
8	1966-05-24	1765.49	1727.8	1446.07	1330.12	1274.56	1237.4	1205.63	1174.71	1143.25	1113.78	1080.43	1049.63	1019.04	990.687	963.171	936.192	910.538	887.388	866.408	846.555	827.655	809.627	791.723	773.505	754.858	736.498	718.405	702.876	689.401	676.548	664.708	653.816	643.584	633.858	624.647	615.859	607.325	598.434	589.245	579.166	567.683	554.607	540.726	526.495	511.716	496.048	478.785	457.293
9	1965-03-04	1907.62	1864.81	1653.99	1588.55	1556.26	1535.68	1520.14	1507.27	1495.96	1485.73	1476.3	1467.17	1457.04	1443.57	1426.73	1408.86	1389.08	1369.14	1348.79	1328.25	1307.39	1286.61	1265.18	1241.68	1216.93	1191	1163.77	1135.92	1109.29	1083.41	1057.72	1033.41	1009.93	986.779	963.386	941.04	919.443	898.242	877.057	855.823	834.447	812.18	789.963	767.731	745.01	720.99	695.241	655.71
10	1969-05-11	3245.87	2934.32	2389.17	2152.26	2002.29	1885.14	1771.24	1676.6	1590.51	1517.09	1459.19	1413.75	1372.44	1332.75	1292.91	1251.51	1209.37	1168.2	1129.01	1090.6	1051.59	1012.04	975.399	943.844	914.013	885.651	858.273	830.714	803.058	776.405	750.649	724.427	698.949	673.471	647.464	623.095	597.603	574.44	552.078	531.021	512.309	495.164	478.836	462.981	447.559	432.289	416.585	393.971
11	1968-11-06	2629.66	2586.46	2255.2	2145.16	2095.9	2063.62	2038.96	2017.61	1998.15	1979.29	1959.97	1942.04	1925.45	1910.65	1897.53	1883.01	1864.48	1839.79	1809.41	1775.03	1739.32	1701.18	1657.91	1614.9	1570.37	1523.77	1480.04	1439.64	1401.52	1366.31	1333.23	1302.15	1272.12	1242.87	1214.35	1186.21	1158.28	1130.25	1101.97	1073.09	1043.14	1011.38	977.123	939.754	897.13	848.865	797.785	739.096
12	1975-05-31	2053.39	2053.39	2053.39	2053.39	2053.08	2051.97	2050.6	2049.17	2047.72	2045.86	2043.19	2029.87	1998.22	1964.79	1933.81	1904.33	1870.58	1827.79	1784.61	1739.6	1676.98	1599.27	1509.34	1419.68	1349.28	1285.29	1224.28	1169.66	1118.9	1075.6	1039.5	1007.02	975.333	944.841	917.597	892.984	869.316	847.353	827.182	807.784	788.514	768.996	748.976	727.803	704.303	673.174	627.715	574.636
13	1961-01-26	1351.05	1296.22	1003.87	914.054	874.916	852.143	833.889	817.694	799.26	779.327	762.331	746.64	731.109	714.841	697.446	680.499	664.115	648.651	634.367	621.147	609.091	597.626	586.776	576.503	566.577	557.157	548.431	540.315	532.569	524.954	517.457	509.384	501.168	493.317	485.851	478.602	471.346	463.828	456.241	448.717	441.044	433.175	425.035	416.458	407.21	396.82	384.501	366.336
14	1979-09-21	1876.76	1839.73	1596.9	1495.86	1448.3	1416.01	1389.65	1362.86	1337.78	1316.3	1297.62	1279.6	1251.8	1222.01	1197.27	1175.28	1152.55	1126	1087.93	1054.63	1026.33	998.75	970.676	945.088	917.617	889.935	861.48	833.572	808.402	784.175	763.224	744.37	726.928	710.218	692.811	675.844	660.064	645.071	632.382	620.785	609.607	598.679	587.785	576.812	565.231	552.07	536.65	504.758
15	1972-01-09	1279.69	1237.57	1002.02	924.229	890.088	869.927	853.518	839.348	825.558	812.084	799.662	788.329	777.361	766.463	756.076	745.973	735.866	725.471	713.869	701.5	688.525	675.751	664.092	653.918	645.128	637.454	630.534	623.826	616.666	608.881	600.456	592.168	583.951	574.949	564.144	553.321	542.953	532.814	522.871	513.174	503.81	494.639	485.517	474.7	463.924	453.011	441.393	428.061
16	1969-02-12	1572.79	1572.57	1494.34	1422.16	1384.68	1358.04	1334.3	1312.22	1291.38	1273.12	1257.89	1244.92	1233.43	1222.52	1211.47	1200.19	1188.96	1177.91	1166.68	1154.8	1141.6	1126.08	1106.69	1083.92	1059.02	1030.87	999.47	969.428	946.958	928.053	910.837	894.997	880.034	865.163	849.15	831.897	814.101	796.182	777.437	757.087	735.58	713.004	689.445	663.668	635.664	606.513	575.795	540.28
17	1972-11-05	1366.09	1358.11	1204.63	1076.64	1017.76	981.456	953.043	929.054	907.261	888.281	871.729	856.574	842.033	827.786	812.18	796.744	782.143	768.249	754.929	741.79	729.049	716.604	704.249	691.853	679.333	666.506	653.327	639.463	624.955	610.297	595.67	581.105	566.434	550.497	534.256	517.951	500.563	481.444	464.594	449.373	435.105	421.382	408.632	396.957	386.134	375.704	365.205	354.306
18	1977-09-18	1207.81	1194.4	983.017	854.843	799.152	764.349	739.04	718.584	700.814	685.546	672.452	660.837	650.187	640.182	630.541	620.96	611.121	600.843	589.99	578.367	565.826	553.049	540.144	527.032	513.844	500.599	486.262	471.422	457.905	444.763	432.033	419.236	406.939	395.463	385.124	375.702	366.934	358.569	350.296	341.983	333.539	325.234	317.015	308.969	301.264	293.918	286.521	278.899
19	1969-09-21	1193.7	1193.53	1097.89	1015.16	976.655	950.994	930.381	912.727	897.11	883.264	871.749	861.512	851.368	840.159	827.267	813.88	801.038	788.794	776.754	764.404	751.365	736.996	720.033	700.774	683.074	666.405	648.461	626.539	602.212	581.893	567.744	555.506	544.475	533.869	523.338	513.149	503.361	493.844	484.362	474.8	464.964	454.613	443.385	431.115	417.226	401.734	383.888	360.609
20	1961-05-27	2199.03	1908.34	1581.39	1497.43	1460.14	1437.67	1420.79	1405.91	1392.17	1378.2	1363.93	1348.05	1331.88	1315.64	1300.92	1286.57	1265.31	1245.74	1227.2	1206.84	1176.7	1141.6	1106.59	1070.9	1035.6	1006.31	979.458	951.77	922.95	894.181	865.981	839.524	817.918	798.092	779.366	761.59	744.989	728.908	711.116	690.231	668.361	646.143	623.122	599.233	573.967	546.824	519.161	488.871
21	1980-06-19	1725.82	1690.68	1484.82	1378.14	1328.02	1294.98	1268.68	1244.28	1221.89	1202.95	1186.1	1169.41	1152.4	1134.89	1117.49	1099.52	1080.29	1060.04	1039.17	1017.13	990.669	958.334	916.181	874.255	833.043	792.277	751.747	719.694	691.067	664.334	638.945	616.232	596.777	580.725	566.332	553.151	541.108	529.703	518.497	507.281	495.804	483.884	470.45	455.293	438.61	419.805	396.957	369.046
22	1978-09-09	1391.24	1391.24	1391.24	1389.33	1385.14	1379.77	1371.02	1354.72	1330.07	1308.5	1290.71	1275.06	1260.94	1248.39	1237	1226.45	1216.3	1205.91	1194.75	1182.91	1170.94	1158.22	1144.67	1130.25	1114.62	1098.14	1081.96	1067.49	1054.65	1042.78	1031.39	1019.56	1007.2	994.68	982.372	970.46	958.697	946.889	934.923	922.598	908.678	893.446	877.147	859.525	840.252	818.933	794.278	761.122
23	1964-03-18	1503.9	1503.9	1488.5	1459.2	1433.55	1413.39	1394.57	1370.36	1345.64	1323.09	1303.53	1285.65	1266.94	1243.7	1220.94	1200.94	1181.65	1161.13	1139.16	1114.85	1088.39	1057.04	1024.65	991.896	957.274	926.393	898.485	873.582	850.614	830.465	810.778	792.746	775.993	759.869	743.923	728.364	713.189	698.386	683.612	668.418	652.679	636.76	621.024	605.181	588.32	568.555	544.384	515.874
24	1978-10-17	1183.84	1183.84	1181.19	1170.2	1158.19	1143.82	1127.54	1111	1095.29	1080.52	1066.69	1054.19	1042.68	1031.75	1021.18	1010.51	999.097	986.81	974.305	960.731	946.67	932.725	918.565	903.587	887.782	871.814	855.238	836.821	819.805	803.745	787.62	771.737	757.201	743.847	730.975	718.014	704.431	690.138	676.209	662.74	649.54	636.521	623.391	609.894	595.483	578.597	560.225	539.874
25	1975-10-05	1774.31	1758.07	1612.25	1494.04	1412.64	1358.92	1310.18	1263.51	1225.06	1194.22	1168.11	1143.46	1116.28	1087.09	1058.95	1032.41	1007.1	982.903	959.287	934.917	908.15	877.448	842.11	803.713	771.913	745.416	718.243	692.097	667.526	643.605	620.797	599.608	579.391	559.586	540.063	519.41	500.076	482.953	466.118	445.091	423.73	407.262	392.621	378.66	365.306	352.34	339.463	326.337
26	1958-01-21	1671.54	1638.84	1378.93	1250.71	1192.01	1153.64	1122.45	1094.39	1069.65	1047.51	1026.82	1005.03	984.397	966.398	950.127	933.971	916.218	898.482	879.499	859.553	836.572	809.728	781.541	752.054	723.987	696.431	671.532	648.738	627.671	608.394	590.782	574.506	559.117	544.195	529.629	515.298	501.047	487.254	473.812	460.636	447.607	434.648	421.732	408.717	395.274	380.752	364.278	344.656
27	1963-08-13	1480.16	1432.83	1086.79	966.829	914.181	883.26	859.671	840.073	823.601	809.253	795.955	783.225	771.449	761.043	751.822	743.248	734.959	726.544	716.698	705.722	695.159	683.428	668.337	652.114	636.383	620.873	605.33	590.67	576.545	562.951	549.096	535.037	521.383	508.964	498.145	488.636	479.968	471.841	464.043	456.434	448.846	441.074	433.007	424.499	415.321	405.111	392.883	377.539
28	1977-06-19	2536.6	2017.44	1607.95	1512.13	1467.5	1439.06	1416.53	1398	1381.41	1365.91	1351.52	1337.73	1325.39	1314.1	1303.54	1293.49	1283.75	1273.89	1262.25	1248.71	1232.93	1213.33	1186.95	1151.13	1113.55	1080.43	1050.96	1024.48	1001.96	983.189	966.755	951.485	936.988	922.881	908.987	894.94	879.922	863.677	846.442	827.892	808.016	786.294	761.069	732.948	702.631	669.427	629.973	579.207
29	1978-07-25	1998.95	1987.51	1896.74	1836.97	1797.17	1765.7	1723.61	1663.66	1612.27	1570.35	1533.56	1495.31	1448.08	1390.97	1334.46	1279.05	1222.72	1174.45	1125.8	1080.25	1027.96	961.363	885.277	837.128	799.318	761.809	722.87	682.906	646.973	617.163	591.662	569.815	550.245	531.59	513.73	496.921	480.84	465.734	451.455	437.709	424.604	411.703	398.85	385.711	371.994	357.307	340.963	320.947
30	1978-09-27	2902.42	2843.21	2546.88	2342.88	2243	2174.91	2118.38	2069.61	2028.64	1992.1	1950.94	1895.71	1842.28	1794.24	1752.3	1714.94	1676.41	1633.15	1589.65	1543.76	1492.43	1426.53	1340.73	1271.39	1205.71	1142.94	1083.85	1039.08	1004.03	973.834	946.124	920.59	896.57	874.326	854.006	835.2	817.89	801.91	786.823	772.29	757.728	742.232	725.5	707.782	689.194	669.167	646.831	619.38
31	1977-07-14	2328.73	2269.59	1972.91	1838.9	1774.86	1730.59	1693.81	1660.45	1631.68	1607.18	1584.47	1560.26	1538.01	1518.2	1499.51	1480.19	1458	1430.65	1402.83	1371.21	1330.07	1280.5	1230.54	1180.39	1134.59	1086.46	1034.44	987.197	947.647	913.634	883.348	856.049	831.114	808.162	787.674	769.421	752.391	736.155	720.357	704.815	689.25	673.555	657.305	640.198	621.561	598.631	567.991	526.703
32	1966-04-28	2360.61	2212.43	1823.64	1706.14	1649.06	1610.07	1577.55	1546.35	1516.18	1489.03	1461.43	1435.52	1410.85	1387.31	1365.83	1346.03	1327.59	1309.6	1291.27	1271.53	1248.3	1220.16	1184.44	1145.01	1106	1071.67	1036.59	1003.57	974.153	947.39	922.89	901.264	883.071	867.022	852.708	839.723	827.681	816.214	805.1	794.113	782.963	771.346	758.665	743.045	724.123	700.088	663.733	589.811
33	1975-06-26	1447.42	1447.38	1324.56	1263.98	1228.14	1200.54	1177.52	1156.96	1138.77	1122.92	1109.09	1096.85	1085.82	1075.51	1065.22	1054.41	1043.21	1031.89	1020.53	1009.05	997.339	985.298	972.729	959.269	943.702	927.78	912.499	896.751	881.059	866.458	852.414	839.095	826.527	814.993	804.682	794.797	785.036	775.263	765.435	755.51	745.53	735.455	725.169	714.501	703.374	691.899	679.627	665.125
34	1968-10-29	3016.38	1399.77	1124.37	1038.81	989.977	957.782	934.67	915.968	895.618	871.684	852.081	836.1	823.482	813.136	803.909	794.881	785.673	776.095	766.108	755.21	742.916	729.784	716.05	701.471	686.107	669.994	653.509	636.939	620.621	604.677	589.129	574.036	559.305	544.842	530.654	517.005	503.826	491.351	479.898	469.347	459.423	449.978	440.896	432.074	423.436	414.894	406.394	397.896
35	1981-05-09	1558.59	988.008	780.744	679.678	633.813	606.427	584.781	567.23	552.136	538.351	526.108	515.492	505.822	496.68	488.079	480.044	472.543	465.423	458.56	451.887	445.358	438.932	432.49	425.985	419.397	412.718	405.924	398.912	391.859	384.942	378.346	372.092	366.172	360.589	355.299	350.258	345.386	340.646	336.02	331.482	327.009	322.571	318.133	313.725	309.389	305.098	300.798	296.388
36	1980-06-25	1580.13	857.997	689.339	637.887	611.786	594.288	580.795	569.872	560.803	553.092	546.335	540.188	534.352	528.556	522.677	516.552	510.559	505.121	499.858	494.572	489.152	483.526	477.63	471.254	464.279	457.213	450.291	443.602	437.041	430.501	424.044	417.709	411.461	405.321	399.261	393.221	387.128	380.911	374.583	368.15	361.596	354.84	347.83	340.639	333.296	325.567	317.014	307.937
37	1977-11-08	1257.93	1210.09	1033.93	963.424	925.229	895.332	867.488	844.567	827.545	814.298	802.984	792.816	782.819	771.666	755.84	737.303	721.413	707.605	695.954	685.853	676.858	668.171	659.322	649.923	639.708	628.668	617.034	605.216	593.352	581.752	570.42	559.262	547.927	536.349	524.697	512.49	500.916	489.471	477.805	465.749	453.426	440.924	428.977	417.826	407.097	396.626	386.434	376.424
38	1980-12-01	2718.72	2216.89	1440.55	1228.37	1136.84	1079.12	1034.44	997.826	968.523	945.222	926.267	909.909	895.002	880.767	866.477	850.851	827.62	791.772	762.332	739.144	718.257	699.307	682.608	667.237	651.879	636.263	620.223	603.678	586.525	568.505	549.284	529.252	509.31	490.365	473.361	457.938	443.259	429.1	415.365	402.112	389.836	378.616	368.335	358.852	349.965	341.517	333.437	325.654
39	1977-11-10	1525.75	1525.75	1412.29	1340.12	1297.14	1262.73	1233.72	1210.81	1192.48	1177.51	1164.83	1153.47	1142.21	1130.59	1118.7	1106.37	1093.4	1078.84	1062.61	1045.44	1027.64	1009.3	990.617	971.019	950.582	929.508	908.045	885.627	860.577	837.464	815.978	796.681	780.444	765.963	752.456	739.612	726.63	712.918	698.977	684.977	670.982	656.775	641.951	626.304	609.09	588.765	568.938	547.658
40	1976-07-04	1056.62	1044.35	826.462	754.504	723.348	705.167	692.489	682.641	674.483	667.614	661.684	656.435	651.661	647.096	642.508	637.241	631.488	625.77	619.939	613.741	606.958	599.347	591.183	582.73	573.108	561.352	549.599	538.421	527.547	516.941	506.466	495.901	485.3	474.905	464.383	453.343	442.575	432.233	422.466	413.114	404.212	395.705	387.282	378.666	369.381	358.849	346.061	329.812
41	1977-09-28	1804.07	1748.79	1405.09	1298.83	1248.28	1213.37	1184.22	1157.03	1132.16	1110.36	1089.96	1070.3	1051.17	1033.37	1016.66	999.408	983.626	968.515	953.214	936.847	918.455	896.991	871.419	842.413	810.194	775.194	739.021	703.214	675.755	652.054	630.2	609.339	588.672	567.943	546.722	526.351	507.101	489.01	471.185	453.919	437.351	421.429	406.064	391.596	377.796	364.362	351.071	337.824
42	1977-05-06	1815.19	1674.61	1395.79	1293.96	1245.46	1212.19	1183.02	1157.77	1135.21	1114.14	1095.77	1080.12	1066.3	1053.54	1041.19	1028.69	1015.57	1000.85	985.313	968.852	953.736	940.83	929.63	919.739	910.333	900.958	891.546	881.97	872.252	862.757	853.788	845.276	836.986	828.694	820.314	811.585	802.645	794.058	785.528	776.792	767.641	758.12	748.108	737.375	725.609	711.917	692.741	670.7
43	1979-11-30	1235.91	993.658	774.312	713.857	683.446	663.128	649.46	638.434	628.965	620.634	613.184	606.323	599.833	593.567	587.416	581.251	574.979	568.575	562.026	555.405	548.827	542.397	536.183	530.2	524.423	518.79	513.24	507.712	502.166	496.585	490.98	485.408	479.935	474.57	469.29	464.031	458.707	453.348	447.958	442.53	437.02	431.329	425.364	419.051	412.178	404.504	396.099	386.919
44	1968-01-25	1810.35	1781.71	1519.58	1394.3	1332.34	1290.78	1257.18	1225.65	1195.72	1169.03	1146	1126.08	1108.63	1092.69	1077.19	1060.77	1040.36	1015.6	987.79	959.184	929.519	899.261	869.697	839.813	808.287	780.97	755.468	731.683	710.371	691.562	674.566	658.722	643.763	629.606	616.081	603.073	590.408	577.945	565.534	553.041	540.268	527.041	513.08	498.082	481.849	463.648	442.087	420.762
45	1946-03-22	926.032	868.524	638.59	576.617	546.867	527.686	512.749	500.185	489.833	481.337	474.118	467.692	461.709	455.77	449.6	443.02	435.995	428.516	420.603	411.974	402.903	393.742	384.548	376.015	368.412	361.406	354.819	348.537	342.477	336.603	330.89	325.307	319.831	314.472	309.302	304.477	299.993	295.749	291.543	287.313	283.012	278.618	274.09	269.34	264.179	258.126	250.982	242.809
46	1983-09-27	1404.06	932.129	699.27	599.018	552.842	524.067	504.387	489.834	478.4	469.063	461.208	454.344	448.12	442.293	436.74	431.384	426.173	421.039	415.944	410.874	405.799	400.698	395.558	390.38	385.16	379.896	374.592	369.235	363.816	358.332	352.799	347.189	341.441	335.582	329.659	323.682	317.653	311.545	305.394	299.207	292.982	286.713	280.434	274.183	267.959	261.776	255.708	249.631
47	1977-09-15	1701.19	1693.4	1454.94	1361.57	1317.29	1287.31	1261.53	1238.75	1219.01	1202.49	1188.37	1174.48	1159.84	1147.27	1136.03	1125.97	1117.03	1108.87	1101.17	1093.6	1085.76	1076.88	1066.17	1051.89	1034.14	1013.95	993.701	971.572	948.368	924.615	899.403	871.807	845.308	821.286	798.603	777.334	757.726	739.325	721.772	704.764	688.113	671.765	655.648	639.278	622.216	603.944	583.651	560.664
48	1983-05-13	1367.6	1366.85	1165.9	1030.47	965.959	913.918	872.437	842.293	820.757	804.982	793.004	783.234	774.799	767.167	760.023	753.041	743.807	732.168	719.988	707.936	695.97	683.907	671.563	658.878	645.896	632.626	619.199	605.701	592.261	578.911	565.783	552.962	540.48	528.358	516.676	505.601	495.091	485.081	475.549	466.458	457.794	449.529	441.633	434.037	426.725	419.602	412.633	405.749
49	1972-04-25	2120.44	2104.75	1847.65	1733.56	1680.76	1645.9	1618.05	1594.56	1575.24	1559.39	1546.01	1534.27	1523.48	1513.35	1503.9	1495.15	1486.99	1479.25	1471.77	1464.38	1456.96	1449.37	1441.53	1433.4	1424.69	1413.46	1398.73	1382.29	1363.83	1342.31	1317.96	1291.35	1262.68	1232.57	1203.25	1175.43	1148.73	1122.48	1096.98	1072.24	1047.64	1022.98	997.885	971.92	944.744	915.628	881.446	837.453
50	1980-10-06	2141.17	1467.83	1089.45	949.213	886.328	846.785	817.744	795.114	776.686	761.175	747.851	736.205	725.774	716.274	707.391	698.916	690.736	682.698	674.68	666.236	656.831	646.331	634.798	621.917	607.85	593.093	578.136	563.255	548.456	533.853	519.462	505.347	491.486	477.979	464.956	452.356	440.09	428.072	416.277	404.834	393.755	383.002	372.479	362.275	352.366	342.731	333.275	323.978
51	58	1633.92	1396.38	1048.87	961.431	922.09	896.428	875.928	857.219	837.241	814.92	793.678	775.226	760.526	748.803	738.744	729.682	721.269	713.217	705.372	697.67	689.624	680.98	670.301	656.404	641.578	628.28	616.595	605.186	594.358	585.862	578.504	571.559	564.817	558.217	551.764	545.444	539.182	532.869	526.31	519.536	512.457	504.867	495.749	485.005	470.786	450.77	417.93	367.017
52	72	2063.48	834.415	544.853	444.704	396.341	368.851	350.915	338.284	327.864	319.26	312.64	306.506	300.831	295.612	290.714	286.03	281.519	277.174	272.997	269.122	265.407	261.746	258.112	254.47	250.806	247.111	243.369	239.48	235.111	230.364	224.328	213.845	207.413	203.402	199.549	195.77	192.068	188.407	184.366	180.752	177.25	173.709	170.159	166.723	163.226	159.701	156.24	152.646
53	85	2199.58	1032.14	759.379	662.465	613.294	582.923	561.934	546.078	533.078	521.736	511.602	502.28	493.35	484.515	475.419	463.802	442.197	416.023	392.711	374.461	360.501	349.355	340.26	332.406	325.612	319.777	314.138	308.824	303.546	298.411	293.261	288.042	282.117	275.369	267.331	257.129	247.414	239.311	231.977	225.314	219.519	214.385	209.686	205.222	201.267	197.345	193.276	189.433
54	84	2948.01	1975.42	1375.33	1150.78	1047.99	991.82	953.937	924.915	900.273	878.168	857.795	838.922	821.559	805.637	791.049	777.58	764.993	753.07	741.627	730.534	719.661	708.877	698.022	686.914	675.157	661.983	644.951	618.896	578.391	534.454	499.482	471.144	445.746	426.01	406.241	381.573	353.791	340.744	331.179	322.803	315.026	307.654	300.625	293.898	287.311	280.807	274.346	267.837
55	70	2137.1	952.645	722.176	641.04	597.864	570.764	550.24	534.321	521.626	510.415	500.617	491.604	483.575	476.12	469.019	462.193	455.677	449.493	443.611	437.852	432.101	426.317	420.461	414.426	408.056	401.135	393.517	384.42	372.548	355.327	324.283	261.416	245.53	237.478	230.684	224.326	217.735	210.608	202.915	195.049	187.712	181.463	176.18	171.338	166.718	162.164	157.557	152.975
56	75	1243.56	1243.56	1243.56	1239.5	1229.88	1221.31	1214.51	1208.24	1199.31	1188.02	1175.61	1161.48	1147.29	1133.91	1121.34	1109.62	1098.6	1088.02	1077.72	1067.53	1057.31	1046.87	1035.92	1023.99	1010.19	991.733	961.954	923.628	883.913	850.79	828.085	809.133	793.727	780.599	768.011	753.228	733.514	707.381	688.201	675.715	664.688	654.528	644.179	633.641	622.242	609.744	595.417	579.608
57	75	1547.06	1396.68	1143.82	1065.12	1025.65	1001.75	984.57	969.78	960.126	950.655	941.447	932.972	925.096	918.091	912.673	907.737	902.966	898.317	893.766	889.295	884.889	880.531	876.222	871.945	867.664	863.303	858.864	854.416	850.012	845.635	841.253	836.637	831.936	827.163	819.087	803.838	793.867	786.344	778.412	769.824	760.898	751.419	741.141	729.599	711.935	692.904	664.038	629.576
58	80	1008.36	838.488	659.364	598.466	569.368	552.068	541.937	533.493	525.627	518.083	511.267	505.762	501.048	496.729	492.583	488.588	484.757	481.071	477.511	474.06	470.724	467.487	464.325	461.213	458.127	455.067	452.045	449.07	446.14	443.249	440.372	437.516	434.687	431.881	429.094	426.319	423.559	420.835	418.099	415.34	412.552	409.73	406.87	403.961	401.014	398.023	394.963	391.813
59	76	1120.15	1079.04	937.559	881.87	855.649	838.82	826.878	816.522	807.671	799.662	792.099	784.65	777.572	771.211	765.554	760.447	755.777	751.47	747.464	743.679	740.043	736.504	733.017	729.552	726.076	722.529	718.809	714.824	704.857	622.518	594.865	579.586	564.562	545.334	515.685	442.203	420.174	409.834	402.324	394.45	389.078	381.956	376.727	371.09	364.922	359.621	353.923	348.099
60	83	2208.54	923.385	707.982	630.203	589.138	562.306	543.108	528.38	515.786	505.004	495.708	487.232	479.316	471.828	464.728	458.043	451.698	445.583	439.638	433.802	428.044	422.304	416.516	410.629	404.606	398.369	391.827	384.814	377.108	368.3	357.498	341.363	314.238	295.451	282.563	272.777	264.794	257.931	251.566	245.7	240.274	235.112	229.887	225.013	220.099	215.032	210.199	205.166
61	80	1763.57	1604.05	1160.13	1042.23	996.317	971.159	954.847	940.938	930.215	919.501	909.155	899.777	892.269	885.692	879.53	873.644	867.945	862.355	856.768	851.109	845.262	838.869	831.587	823.115	814.864	807.753	801.446	795.498	789.673	783.962	778.096	772.347	766.883	761.445	744.764	734.069	724.446	717.53	710.958	704.489	696.812	689.681	679.976	671.479	659.955	644.592	621.299	585.043
62	60	3539.44	1456.81	1076.91	960.269	902.904	866.249	839.659	819.052	801.666	786.426	772.65	759.485	745.666	714.388	678.591	652.662	632.971	616.821	603.306	591.283	580.498	570.986	562.503	554.453	546.77	539.894	533.419	527.007	520.889	515.097	509.284	503.448	497.921	492.267	486.355	480.55	474.473	467.935	461.158	453.72	444.492	433.119	416.273	400.981	391.758	385.027	378.686	372.212
63	70	2416.79	2172.18	1448.34	1252.93	1176.75	1135.65	1104.83	1078.69	1051.2	1019.74	990.354	966.561	947.361	931.198	917.004	904.077	891.885	880.201	868.799	857.453	845.651	833.009	816.457	798.784	783.405	769.497	756.404	743.592	730.766	717.5	703.749	689.355	674.219	659.391	645.981	633.189	620.585	608.892	596.532	584.395	573.004	560.891	549.613	535.805	521.747	504.028	475.804	428.78
64	69	1749.14	1733.75	1302.81	1173.11	1126.15	1099.34	1079.56	1062.37	1044.91	1023.52	1004.28	989.13	977.523	968.062	959.679	952.022	944.897	938.149	931.719	925.783	920.086	914.539	909.074	903.614	898.038	892.231	886.079	879.244	871.296	862.218	852.404	843.209	835.018	827.313	819.751	811.595	802.476	794.473	787.083	779.77	772.227	764.452	757.193	748.806	739.472	729.575	717.488	703.964
65	65	2416.49	1874.47	1295.59	1133.6	1066.09	1024.95	995.863	971.469	948.947	927.71	908.428	890.825	875.186	861.462	849.674	839.616	830.616	822.277	814.43	806.908	799.57	792.215	784.656	776.68	768.088	758.528	747.869	735.565	720.976	706.514	691.469	673.835	650.246	600.937	584.296	576.569	569.292	562.192	555.404	548.647	541.88	534.953	528.114	521.279	514.531	507.635	500.426	492.941
66	78	1104.41	1103.3	1020.87	940.145	902.025	878.684	861.901	848.07	835.933	824.025	811.828	799.957	788.894	779.059	770.505	763.032	756.454	750.553	745.186	740.284	735.692	731.28	726.973	722.711	718.461	714.168	709.756	705.147	700.256	694.914	688.72	680.906	669.935	652.201	621.717	576.393	549.223	537.215	529.098	523.19	517.392	512.162	506.919	501.895	496.835	491.935	487.074	482.39
67	76	1828.23	1593.27	1336.65	1270.5	1238.75	1218	1201.09	1186.21	1170.77	1154.76	1139.4	1126.22	1115.14	1105.57	1097.05	1089.23	1081.95	1075.12	1068.41	1061.72	1054.86	1047.42	1038.02	1021.11	996.47	975.607	959.101	944.982	931.471	919.766	909.767	900.829	892.246	883.811	874.335	865.264	855.854	847.141	839.241	830.437	822.368	813.091	803.789	792.52	780.157	764.538	743.268	692.409
68	77	2530.38	1976.4	1799.51	1751.97	1726.32	1706.13	1689.35	1674.19	1660.4	1647.99	1636.4	1625.26	1614.21	1602.79	1590.04	1575.24	1555.89	1521.64	1422.64	840.983	593.078	521.034	484.237	459.784	441.529	426.708	415.363	405.052	395.39	386.566	378.655	371.561	365.026	358.673	352.331	345.909	339.358	332.557	324.788	315.393	304.117	291.48	280.258	272.042	265.161	258.866	252.874	247.034
69	82	1144.32	955.22	705.646	631.744	596.019	571.761	554.79	540.798	528.85	517.65	507.176	497.308	488.069	479.721	472.365	465.552	459.173	453.167	447.504	442.116	436.916	431.837	426.798	421.767	416.712	411.593	406.342	400.782	394.754	387.56	367.243	354.012	340.148	321.541	292.254	245.004	232.648	226.179	220.518	215.562	211.363	207.563	203.649	199.908	196.163	192.297	188.485	184.344
70	82	1298.86	794.322	643.402	583.643	549.814	527.661	512.793	501.154	491.587	483.505	476.417	469.878	463.759	458.023	452.699	447.682	442.861	438.209	433.694	429.278	424.932	420.619	416.294	411.923	407.48	402.917	398.173	393.149	387.659	381.387	373.81	363.642	347.022	332.738	321.207	312.056	304.525	298.051	292.248	286.808	281.761	276.787	272.145	267.478	262.893	258.404	253.829	249.351
71	63	2320.19	1865.31	1478.71	1384.79	1342.39	1313.76	1289.97	1268.51	1244.52	1215.63	1186.49	1163.69	1146.51	1132.57	1120.52	1109.54	1099.14	1089.04	1078.98	1068.53	1056.79	1041.03	1014.72	985.87	965.926	949.921	936.061	922.941	909.433	895.467	882.07	868.883	855.338	826.462	810.78	797.817	785.138	774.305	762.639	751.676	739.897	728.363	714.736	700.416	680.948	654.829	607.881	525.331
72	74	1678.54	1494.02	1329.42	1284.29	1261.83	1246.68	1233.96	1220.46	1203.99	1189.19	1178.13	1169.74	1162.85	1157	1151.85	1147.1	1142.61	1138.31	1134.15	1130.09	1126.08	1122.06	1117.93	1113.5	1108.37	1101.49	1091.38	1083.66	1078.3	1071.3	1063.97	1057.85	1051.98	1045.63	1035.65	1019.81	1008.56	999.413	991.452	982.889	973.982	964.268	953.128	941.24	926.308	907.954	879.642	816.599
73	68	1815.38	1793.75	1433.34	1326.86	1282.48	1255.38	1233.9	1213.64	1190.74	1167.53	1146.73	1129.8	1116.13	1105.04	1095.47	1086.82	1078.75	1071.03	1063.45	1055.72	1047.52	1037.69	1020.21	996.909	978.471	965.395	954.679	944.539	933.039	918.238	904.599	896.56	889.627	882.712	875.797	866.216	858.842	851.107	844.205	837.428	830.129	822.648	813.788	803.833	791.105	774.015	746.963	688.839
74	68	1953.94	1220.95	991.929	910.858	870.364	844.907	826.774	813.158	801.441	791.477	783.105	775.303	767.85	760.688	753.853	747.257	740.153	718.824	678.139	641.39	614.274	595.162	579.95	567.427	559.447	552.689	545.15	539.386	532.615	527.016	520.903	515.145	509.42	503.725	497.942	491.927	485.883	479.41	472.513	465.901	460.332	455.525	450.678	445.029	439.965	435.461	430.751	425.058
75	80	2455.8	1183.09	852.543	728.3	668.152	634.145	612.305	595.632	581.813	569.835	558.624	546.296	531.587	515.45	499.662	485.568	472.226	460.258	449.968	441.289	433.645	426.633	420.017	413.635	407.438	401.381	395.333	389.022	381.909	374.66	366.64	356.96	344.388	324.251	309.181	301.952	295.063	288.194	281.1	273.573	265.274	255.756	244.432	231.586	220.572	212.328	205.503	199.376
76	71	1278.7	1278.7	1182.78	1102.9	1067.36	1045.74	1030.11	1017.59	1006.41	995.792	985.184	974.568	964.47	955.403	947.459	940.403	934.001	928.078	922.444	916.914	911.024	904.586	897.482	888.672	877.699	867.319	858.502	850.303	841.914	832.728	822.732	812.689	803.288	794.288	785.879	777.983	770.511	763.191	756	748.847	741.474	734.184	726.861	719.169	711.162	702.222	692.644	682.599
77	73	2580.89	2461.36	2126.16	2027.04	1973.86	1938.28	1909.65	1881.7	1846.89	1805.08	1766.48	1735	1710.27	1691.44	1676.51	1663.93	1652.8	1642.57	1632.82	1623.19	1613.4	1603.05	1591.24	1575.93	1549.95	1495.91	1431.28	1394.99	1366.92	1339.92	1314.69	1297.94	1283.96	1270.11	1255.52	1240.7	1226.31	1213.09	1200.09	1187	1173.13	1157.64	1139.14	1116.92	1088.06	1029.51	911.41	815.222
78	69	2219.52	2199.95	2021.21	1930.19	1877.4	1836.58	1799.41	1758.35	1708.07	1660.71	1622.74	1594.01	1571.76	1553.55	1537.64	1523.18	1509.64	1496.66	1483.86	1470.96	1457.49	1442.45	1422.88	1387.06	1330.42	1281.82	1240.38	1192	1132.84	1096.99	1078.83	1063.19	1049.46	1036.49	1024.35	1012.46	1000.92	989.522	978.047	966.288	953.784	940.32	925.508	907.773	883.556	847.95	749.144	639.932
79	71	2104.95	1767.28	1488.42	1412.86	1378.28	1355.16	1338.48	1322.28	1308.36	1294.54	1281.77	1270.74	1261.22	1253.29	1246.07	1239.22	1232.65	1226.27	1220.04	1213.91	1207.81	1201.62	1194.95	1187.46	1178.45	1167.89	1156.73	1144.56	1130.84	1118.28	1108.11	1098.57	1089.09	1076.92	1062.42	1049.02	1037.3	1026.97	1016.1	1005.33	993.579	981.041	968.463	953.621	935.625	914.224	882.543	826.803
80	70	1576.22	891.94	706.611	636.966	598.039	572.007	553.845	538.855	526.62	516.537	507.377	498.808	490.833	483.526	476.763	470.326	464.101	458.061	452.164	446.359	440.604	434.857	429.077	423.241	417.31	411.24	404.917	398.193	390.839	382.396	372.398	358.958	338.319	291.123	277.154	267.648	259.84	252.739	246.224	240.204	234.586	229.208	223.983	218.983	214.028	209.235	204.43	199.609
81	82	1366.74	689.315	510.429	448.407	415.479	394.911	380.077	369.369	360.463	352.828	346.337	340.634	335.408	330.462	325.733	321.237	316.999	312.975	309.086	305.295	301.579	297.905	294.239	290.553	286.837	283.083	279.24	275.241	270.996	266.454	261.526	255.881	248.935	240.43	233.954	228.257	222.979	218.053	213.565	209.577	205.835	201.838	198.132	194.399	190.326	186.601	182.612	178.55
82	46	1584.65	1277.05	900.153	813.677	777.611	756.871	740.045	725.688	710.56	695.53	682.426	671.899	663.177	655.64	648.919	642.769	637.018	631.525	626.19	620.972	615.665	610.066	603.742	595.582	585.191	575.358	567.339	560.6	554.797	549.476	544.424	539.56	534.878	530.341	525.904	521.542	517.221	512.828	508.235	503.239	498.086	492.619	486.217	477.494	465.066	442.682	395.424	322.648
83	76	1336.43	1319.8	1017.93	930.637	895.224	875.612	860.654	849.659	838.775	826.909	815.222	805.553	797.276	789.946	783.264	777.053	771.174	765.505	760.046	754.889	749.894	744.816	739.329	733.195	726.411	719.668	713.407	707.48	701.825	696.388	691.059	685.795	680.526	675.203	669.931	664.167	656.167	649.135	643.404	637.32	631.296	623.691	615.758	606.426	594.952	576.679	541.649	482.92
84	80	751.665	680.812	530.839	472.909	447.407	432.595	421.717	412.72	404.884	397.329	389.824	382.697	376.366	370.833	365.953	361.577	357.571	353.819	350.257	346.845	343.54	340.308	337.11	333.923	330.707	327.442	324.084	320.579	316.826	312.679	307.848	301.785	292.386	271.488	232.478	213.971	204.945	198.253	193.337	189.078	185.311	181.771	178.273	175.017	171.523	168.26	164.883	161.41
85	63	2171.88	1194.95	920.872	843.635	807.597	785.315	769.667	756.793	746.438	736.174	726.182	717.279	710.09	703.598	697.588	691.91	686.473	681.22	676.095	671.109	666.398	661.694	656.915	651.974	646.797	641.478	636.067	630.675	625.322	619.947	614.572	609.201	603.871	598.614	593.419	584.735	575.932	569.333	562.885	556.135	548.722	541.017	533.172	524.578	513.48	501.278	486.323	470.754
86	83	2551.06	893.669	652.156	570.326	525.953	496.745	475.129	458.622	444.704	431.788	419.119	406.617	392.095	373.697	343.945	308.741	281.214	262.513	249.193	238.919	231.006	224.31	217.972	211.753	205.768	199.811	194.221	189.069	184.832	180.725	176.657	172.524	168.742	164.72	160.763	156.79	152.731	148.97	145.043	140.733	135.84	130.883	125.49	119.546	114.58	110.633	106.649	102.508
87	61	2629.32	2250.91	1738.8	1591.56	1523.02	1479.5	1445.66	1415.64	1384.88	1354.57	1326.1	1301.69	1281.74	1264.72	1249.63	1235.9	1223.09	1210.96	1199.04	1187.05	1174.59	1161.02	1145.58	1125.76	1094.3	1038.13	968.021	923.972	897.923	879.719	865.396	853.147	842.252	832.37	823.053	813.915	804.322	795.192	786.003	776.768	767.467	757.148	745.667	732.755	717.324	696.616	665.243	606.158
88	64	2198.55	2164.1	1955.11	1817.29	1749.79	1706.81	1673.17	1642.99	1611.89	1576.22	1531.54	1485.02	1446.93	1417.84	1395.95	1379.02	1365.07	1352.87	1341.8	1331.43	1321.45	1311.63	1301.74	1291.62	1281.3	1270.69	1259	1244.97	1226.3	1200.58	1168.72	1136.38	1103.86	1072.19	1040.52	1007.94	974.038	941.86	916.183	890.326	864.829	842.693	819.824	793.18	762.711	723.87	666.768	597.266
89	84	2356.28	1072.92	797.203	695.446	642.538	608.453	585.299	566.385	550.625	537.353	525.244	513.925	503.428	494.072	485.463	477.304	469.553	462.141	455.007	448.071	441.274	434.567	427.896	421.236	414.533	407.777	400.817	393.564	385.821	377.088	366.524	351.255	323.527	301.554	287.894	277.147	268.905	262.09	256.235	250.765	245.351	240.3	235.21	230.308	225.519	220.665	215.996	211.213
90	76	1932.9	1787.7	1621.01	1572.43	1546.89	1527.84	1508.66	1485.13	1455.81	1430.45	1410.2	1393.92	1381.1	1370.5	1361.34	1353	1345.11	1337.52	1330.08	1322.52	1314.39	1305.18	1294.71	1282.24	1268.24	1254.33	1241.47	1227.43	1214.43	1201	1188.03	1176.16	1163.08	1151.38	1139.18	1128.73	1117.09	1106.67	1095.1	1084.24	1072.15	1059.26	1044.42	1027.22	1002.9	965.282	873.902	566.537
91	84	1039.22	886.866	750.5	707.686	686.726	672.017	662.06	653.529	646.412	639.755	633.398	627.243	621.84	616.904	612.418	608.214	604.204	600.372	596.691	593.148	589.715	586.367	583.11	579.94	576.753	573.518	570.181	566.671	562.904	558.713	553.78	547.509	536.263	496.089	467.027	449.992	439.165	430.808	424.096	417.672	411.789	405.811	400.188	394.363	388.796	382.979	377.298	371.344
92	73	1939.52	1091.1	846.345	766.15	723.555	696.086	676.181	661.468	649.479	639.328	630.962	623.608	616.683	610.174	604.01	598.147	592.522	586.963	580.797	574.095	567.091	560.068	553.241	546.695	540.388	534.24	528.186	522.157	516.092	509.889	503.439	496.558	488.79	478.916	467.673	455.514	442.688	430.106	418.856	409.257	400.271	391.355	382.185	372.248	362.659	354.606	346.9	339.206
93	71	969.19	969.19	957.661	927.421	893.864	872.371	856.102	843.156	831.202	819.959	808.871	796.488	783.327	770.468	758.898	749.187	741.196	734.376	728.367	722.939	717.952	713.302	708.907	704.698	700.625	696.65	692.74	688.849	684.92	680.886	676.703	672.342	667.746	662.822	657.34	650.763	642.409	630.385	607.546	580.737	569.784	561.478	554.882	548.972	543.302	538.407	533.387	528.448
94	77	1931.12	1928.49	1820.88	1717.54	1650.14	1610.86	1584.04	1562.12	1540.88	1512.33	1474.37	1434.75	1392.98	1350.28	1310.21	1274.56	1243.91	1218.11	1195.48	1173.97	1151.37	1124.15	1092.96	1062.11	1039.7	1023.23	1008.19	993.197	976.558	953.262	921.092	898.038	877.839	856.492	833.694	809.294	784.916	763.097	745.012	729.375	713.397	695.797	675.666	651.499	625.79	602.378	582.335	567.148
95	78	2125.55	996.876	734.077	645.628	597.514	565.369	542.339	524.363	509.46	496.768	485.078	473.803	462.282	447.704	426.144	407.69	393.586	382.566	373.281	365.283	358.309	352.161	346.662	341.555	336.704	331.971	327.345	322.805	318.34	313.985	309.751	305.624	301.542	297.497	293.373	289.157	284.791	280.178	275.156	269.446	263.052	256.04	248.757	241.728	234.985	228.821	223.153	217.842
96	72	2485.57	2406.84	2067.76	1965.06	1909.62	1870.91	1838.49	1805.2	1763.23	1716.4	1664.22	1614.94	1579.14	1553.57	1533.54	1516.55	1501.21	1486.84	1473.01	1459.38	1445.5	1430.89	1414.33	1390.94	1346.92	1288.83	1245.47	1209.8	1174.84	1150.82	1133.7	1117.83	1102.95	1087.89	1073.19	1054.86	1038.81	1024.76	1011.49	998.384	985.042	971.425	957.036	940.659	921.321	894.754	854.531	744.549
97	81	2346.65	1389.59	1048.52	948.717	898.751	867.227	844.112	825.791	810.022	795.767	782.607	770.183	758.422	747.508	737.512	728.323	719.795	711.788	704.185	696.882	689.808	682.885	676.038	669.219	662.361	655.376	648.151	640.522	632.263	622.895	611.425	594.593	566.475	537.738	516.662	501.928	490.745	481.121	472.752	464.671	457.198	449.69	442.561	435.432	428.263	421.259	414.288	406.513
98	81	1772.22	1565.64	1296.46	1220.75	1184.06	1158.58	1138.13	1119.49	1099.82	1077.71	1058.06	1041.7	1028.61	1017.63	1007.97	999.247	991.137	983.382	975.828	968.314	960.687	952.647	943.835	933.129	918.32	894.462	868.322	848.295	832.921	820.227	808.728	797.972	788.089	778.371	768.882	759.831	751.372	742.613	734.137	725.037	716.126	705.005	692.198	677.075	656.581	623.469	558.685	439.634
99	76	1651.21	1650.15	1403.88	1282.45	1226.78	1191.23	1162.5	1136.63	1109.37	1080.58	1053.87	1031.46	1013.19	997.742	984.159	971.92	960.59	949.793	939.213	928.613	917.558	905.355	891.249	875.849	860.43	845.421	830.704	815.606	798.99	780.962	762.77	746.668	732.798	720.475	708.631	696.392	681.781	668.07	657.766	648.659	640.021	631.61	623.258	614.711	605.977	597.034	587.829	578.482
100	84	1758.61	677.735	483.459	417.08	382.061	359.376	344.424	333.055	323.486	315.997	309.253	303.116	297.357	291.96	286.909	282.342	277.956	273.698	269.575	265.569	261.622	257.697	253.756	249.79	245.788	241.728	237.5	232.947	228.013	222.575	215.474	204.971	184.753	167.662	161.6	157.448	153.798	150.494	147.468	144.621	141.901	139.254	136.596	133.977	131.262	128.508	125.783	123.02
101	65	1654.5	1413.94	1165.44	1096.75	1064.75	1043.8	1026.85	1011.15	994.842	977.545	960.806	946.454	934.755	924.959	916.561	908.999	902.002	895.382	889.02	882.837	876.749	870.682	864.526	857.989	850.774	843.089	835.192	827.265	819.362	811.471	803.705	796.517	789.806	780.607	770.111	760.109	752.542	744.619	737.089	729.468	722.973	715.431	707.181	699.733	690.194	679.556	664.228	644.833
102	71	2724.4	2631.09	2308.75	2171.72	2100.61	2048.61	1999.07	1932.74	1834.4	1747.73	1683.02	1636.34	1602.81	1576.83	1554.93	1535.15	1516.16	1496.92	1475.89	1449.59	1406.49	1316.44	1206.94	1144.17	1104.52	1076.53	1053.61	1031.61	1004.33	970.555	944.608	925.129	909.042	894.609	881.406	868.811	856.928	845.287	833.803	822.208	810.248	797.407	783.166	766.235	744.098	711.371	645.873	562.745
103	78	2090.84	2090.84	1944.6	1812.17	1753.45	1719.08	1694.37	1673.89	1655.06	1636.14	1614.92	1589.89	1561.73	1533.36	1508.29	1487.44	1469.79	1451.6	1433.1	1415.53	1397.92	1380.55	1363.37	1347.39	1333.18	1319.59	1306.06	1293.25	1280.97	1268.79	1256.98	1244.89	1232	1218.39	1203.05	1186.73	1171.64	1157.45	1143.87	1130.76	1117.63	1103.49	1088.57	1073.33	1058.73	1046.05	1032.36	1015.73
104	75	1188.96	1188.96	1188.96	1188.96	1188.96	1188.96	1188.96	1188.96	1188.96	1188.96	1188.96	1188.96	1188.96	1188.79	1188.01	1186.75	1185.1	1183.14	1180.91	1178.45	1175.78	1172.91	1169.81	1166.38	1162.55	1158.12	1152.38	1145.55	1138.64	1132.2	1126.12	1120.19	1114.12	1106.2	1095.25	1081.35	1065.35	1054.14	1045.01	1036.19	1027.3	1018.14	1008.71	999.07	989.506	980.377	971.764	963.561
105	75	1852.73	1532.67	1218.14	1134.91	1096.16	1072.24	1053.44	1039.21	1025.2	1011.24	998.939	988.323	979.019	970.635	962.978	955.869	949.467	943.494	937.659	931.929	926.29	920.712	915.088	909.315	903.118	896.11	888.571	880.823	871.899	861.954	852.971	844.574	836.398	828.05	811.107	795.584	784.981	775.417	765.83	756.232	746.384	735.826	724.474	711.288	696.056	674.347	643.567	592.111
106	70	1681.03	1677.92	1501.69	1422.53	1382.11	1353.13	1329.52	1308.51	1287.93	1266.4	1245.37	1225.51	1208.37	1193.93	1181.45	1170.29	1159.96	1150.16	1140.51	1130.76	1120.42	1108.64	1092.81	1065.25	1020.32	983.661	957.864	938.579	921.84	906.835	891.844	877.785	862.993	851.313	843.15	834.49	826.301	818.4	810.772	803.336	795.818	788.382	780.829	772.883	764.541	755.286	743.972	730.752
107	72	2265.8	1390.49	1075.81	948.058	883.995	845.274	816.855	794.771	776.581	760.549	745.709	731.974	719.179	707.48	696.825	686.848	677.404	668.427	659.866	651.634	643.648	635.839	628.154	620.541	612.934	605.196	597.243	588.958	580.219	570.692	559.678	545.963	526.019	485.171	462.382	439.085	421.236	410.16	401.159	392.986	385.394	378.062	370.979	364.356	357.634	350.874	344.26	337.296
108	68	2172.49	1540.37	1179.71	1076.03	1026.35	994.813	972.287	953.284	937.14	921.847	907.128	894.066	882.451	871.818	861.924	852.595	843.69	835.06	826.601	818.318	809.892	800.998	791.206	780.119	768.191	756.561	745.546	735.065	724.812	714.371	704.068	694.391	685.566	677.071	668.102	658.217	649.797	642.213	632.952	625.143	617.225	609.448	601.421	592.46	582.737	573.206	561.788	549.25
109	82	2147.36	1607.47	1122.55	984.783	923.985	888.226	865.002	846.539	831.465	819.088	807.275	795.175	772.67	746.87	725.98	705.629	686.617	669.528	654.869	642.388	631.483	621.745	612.468	603.301	594.494	586.434	579.096	572.243	565.731	559.433	553.274	547.211	541.196	535.161	529.087	522.923	516.572	509.933	502.904	495.325	486.898	476.954	464.642	448.664	426.36	392.457	354.318	340.937
110	79	2969.03	1628.87	1321.51	1226.62	1174.57	1134.42	1098.24	1069.41	1046.91	1029.86	1016.57	1005.75	996.52	988.384	981.056	974.351	968.141	962.316	956.784	951.472	946.324	941.287	936.328	931.416	926.524	921.628	916.686	911.669	906.533	901.167	895.449	889.345	882.75	875.503	867.234	857.333	844.929	829.182	808.981	783.882	756.06	728.086	702.521	681.246	666.124	657.701	649.794	641.59
111	75	1082.5	1082.5	1005.59	932.369	898.247	875.102	858.137	842.856	828.441	813.872	799.115	784.962	772.448	761.512	751.685	742.317	733.032	723.224	711.946	695.308	676.347	661.043	648.778	638.517	629.463	621.187	613.35	605.826	597.964	589.483	580.343	572.174	564.958	558.16	551.795	545.702	539.739	533.594	526.958	518.921	509.288	500.25	491.681	482.38	471.937	460.412	449.009	439.167
112	69	2023.26	1988.48	1576.18	1416.79	1342.63	1298.74	1269.23	1247.12	1228.81	1212.68	1197.57	1182.76	1167.79	1153.29	1139.94	1127.93	1117.25	1107.43	1098.45	1090.13	1082.09	1074.26	1066.59	1058.85	1051.27	1044.03	1037.1	1030.36	1023.77	1017.28	1010.76	1004.24	997.598	990.819	983.932	976.903	969.678	962.07	953.496	943.027	929.839	915.98	903.418	892.711	882.789	873.107	863.579	854.019
113	80	2468.98	1156.6	870.69	769.996	718.574	685.947	662.987	645.407	630.355	617.725	606.494	596.088	586.316	577.182	568.801	561.03	553.676	546.677	539.993	533.538	527.249	521.081	514.975	508.873	502.707	496.443	490.055	483.423	476.089	467.854	457.777	443.391	427.966	414.842	403.214	393.492	386.077	379.628	373.734	368.214	362.874	357.632	352.391	347.195	342.067	336.946	331.823	326.669
114	68	1279.51	1077.7	923.959	880.947	859.483	845.913	836.013	828.401	820.781	813.65	807.72	802.545	797.958	793.758	789.797	786.02	782.587	779.535	776.563	773.638	770.745	767.862	764.949	761.987	758.977	755.786	752.374	748.758	745.196	741.762	738.37	734.911	731.137	723.738	713.548	705.776	698.012	692.259	685.468	679.635	672.038	665.121	655.878	644.051	631.399	611.018	582.078	536.762
115	67	978.781	978.781	978.781	977.845	973.611	969.237	964.692	959.523	953.33	946.42	939.817	934.142	929.297	925.034	921.162	917.528	914.011	910.509	906.934	903.215	899.273	895.026	890.367	885.185	879.369	872.834	865.078	855.806	845.252	834.112	823.121	811.805	799.212	780.773	735.445	669.123	657.288	650.534	644.743	639.416	634.363	629.31	624.097	618.638	613.044	607.264	601.338	595.159
116	81	1955.28	971.333	758.16	679.566	637.024	610.236	591.54	576.247	564.844	554.777	545.445	536.872	529.574	523.17	517.132	511.374	505.868	500.583	495.467	490.481	485.597	480.8	476.111	471.56	467.009	462.303	457.415	452.279	446.73	439.978	431.365	418.426	386.541	368.615	357.381	348.283	340.07	332.846	327.037	321.256	315.279	309.973	304.221	298.962	293.665	288.084	282.91	277.384
[truncated: 21 more columns]
